# Supplementary material
Source: PubMed Central journal article supplement (PMC4364405)
Supplement: NIHMS442454-supplement-Supp_Fig_S1-S4.pdf [file NIHMS442454-supplement-Supp_Fig_S1-S4.pdf]

**Figure S1.**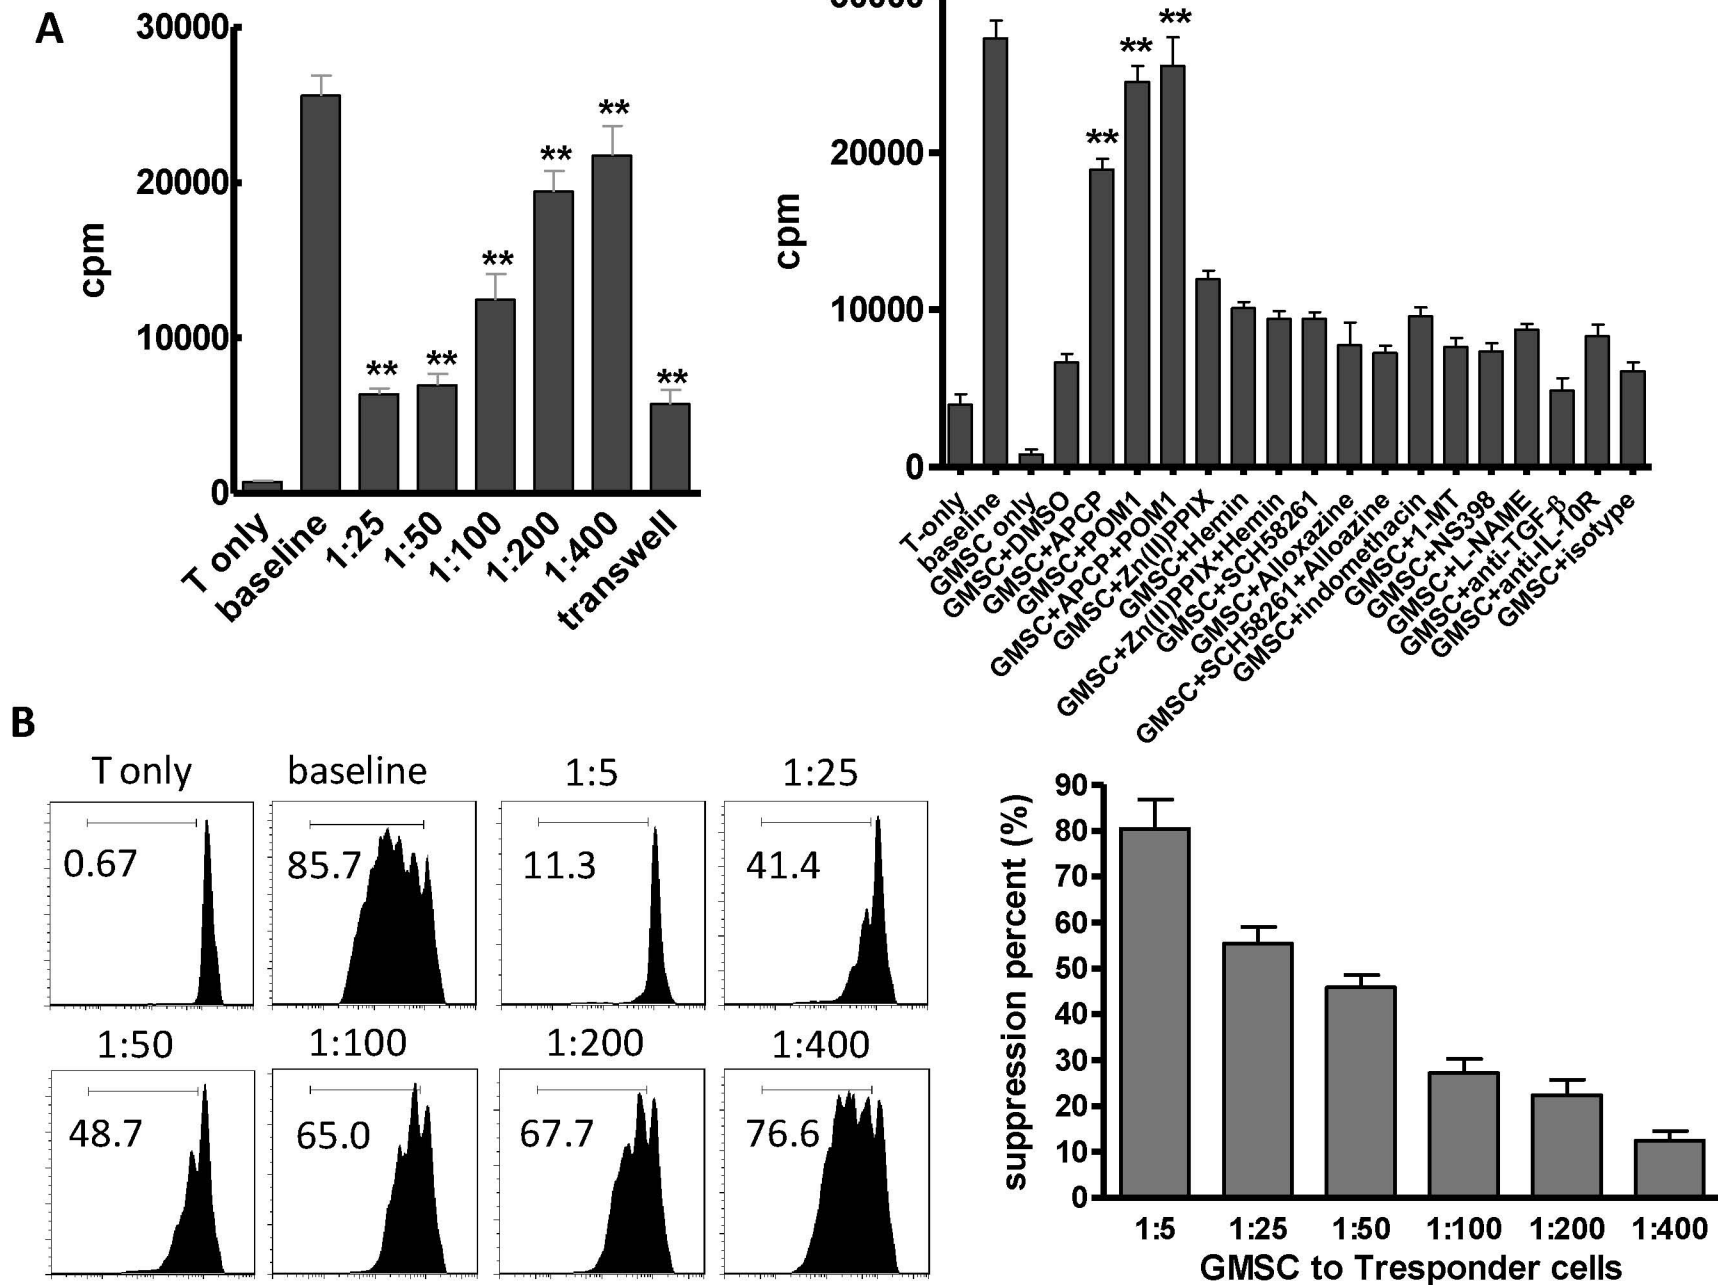

**Figure S1.** GMSCs inhibit mouse T cells proliferation *in vitro*. **A**, Co-culture with or without gradient doses of GMSCs, enriched mouse T cells were stimulated with soluble anti-CD3 and irradiated non-T cells for 72h and  $^3\text{H}$ -thymidine was added for the last 16h. Transwell assays were used in some experiments. Moreover, mouse T cells were co-cultured with GMSCs (1:50) in the presence of soluble factors as indicated in the panel and proliferation was determined as before. Data are presented as the mean  $\pm$  SEM from three separate experiments. **B**, To further examine the function of GMSC, CFSE-labeled enriched mouse T cells were co-cultured with GMSC as panel A. At day 3, the proliferation (CFSE dilution) of responder T cells was analyzed. Cells were gated on live cell (CFSE $^+$ 7-AAD $^-$  cells). The right panel summarizes data from three separate experiments, the mean  $\pm$  SEM percent suppression is shown.

**Figure S2.**

Human fibroblast

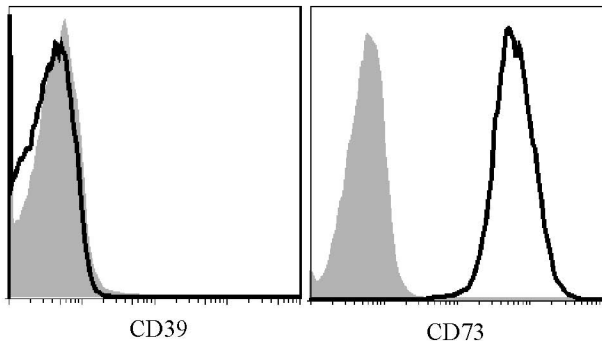

**Figure S2.** Human epidermal fibroblasts express CD73 but not CD39. Human epidermal fibroblast cells were collected and stained with PE-conjugated anti-human CD73 and APC-conjugated anti-human CD39 for half an hour. Their expression was examined by flow cytometry. The experiment was repeated twice.

Figure S3

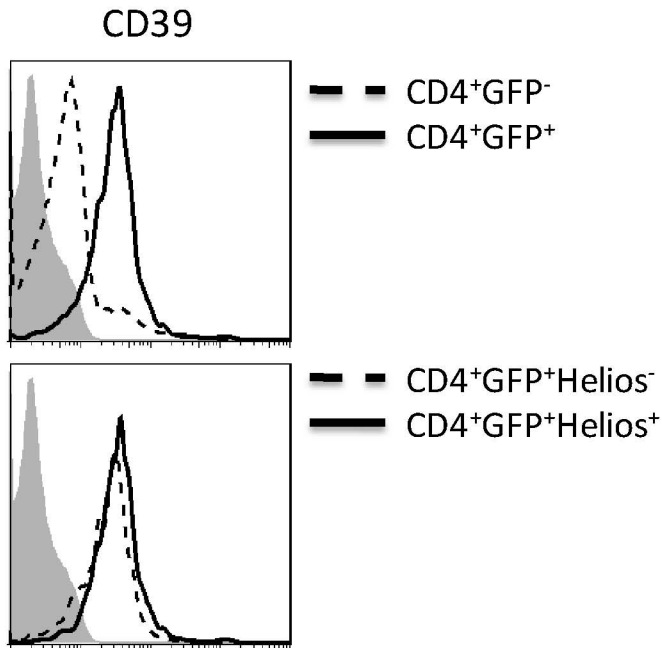

**Figure S3.** Mouse CD4<sup>+</sup>Foxp3<sup>+</sup> Treg cells also express CD39. CD4<sup>+</sup> cells isolated from DBA/1 Foxp3<sup>gfp</sup> reporter mice were stained with different color conjugated anti-mouse CD4, CD39, Helios. Data were collected by flow cytometry. Results are shown as histograms of CD39 expression on each cell population as indicated. The experiment was repeated twice.

Figure S4

A

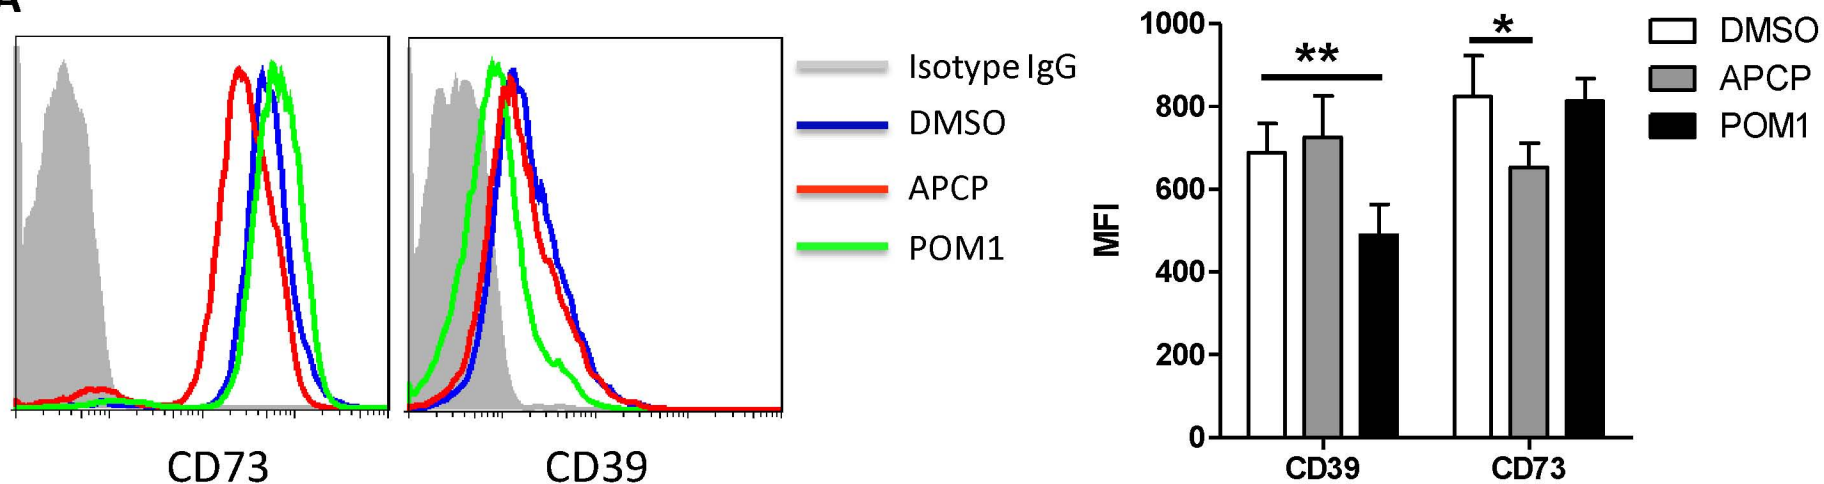

B

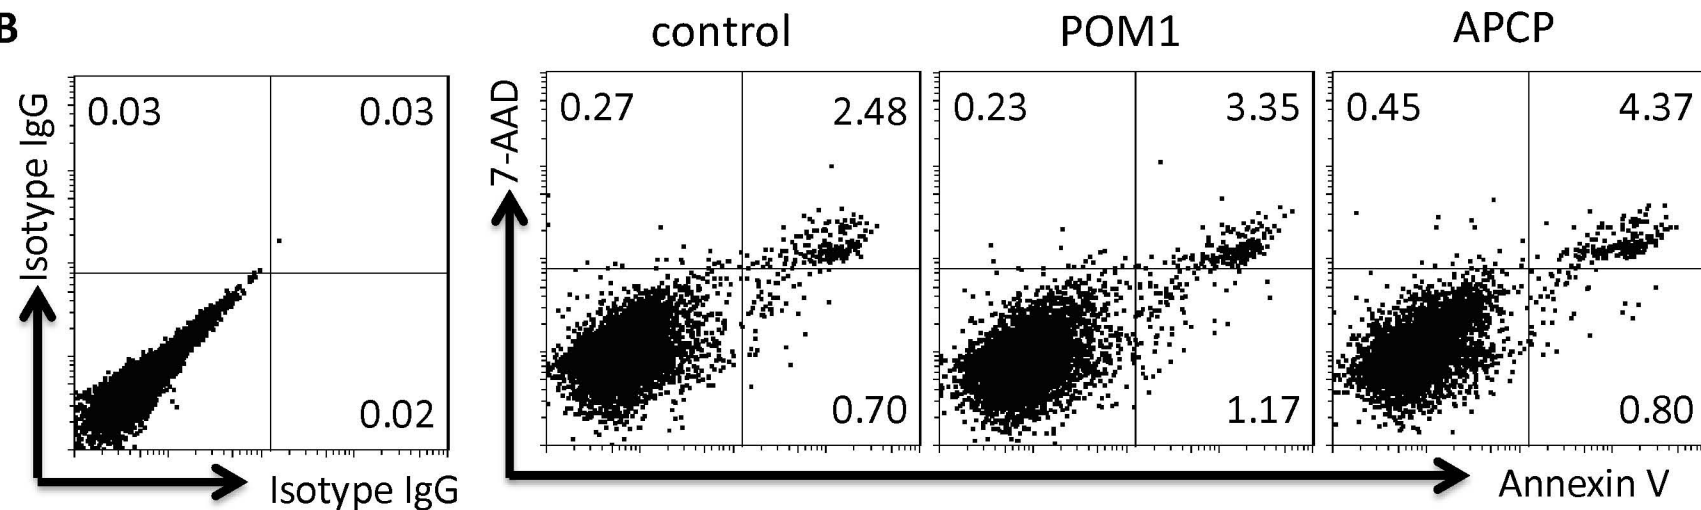

**Figure S4.** Phenotype and cell viability of GMSCs treated with APCP or POM-1 overnight. GMSC cells were cultured with complete medium  $\pm$  DMSO, APCP or POM-1 overnight. Cells were collected and stained for flow cytometry. The experiment was repeated twice. **A**, The expression of CD39 and CD73 are shown as histograms and MFI as indicated. **B**, Representative data of the cells avidity as shown by dot plots.
